# Supplementary material
Source: PubMed Central journal article supplement (PMC3812674)

## SUPPLEMENTAL FILES

### Figure legend for Supplemental Data

#### Supplemental Figure 1 *Structure of ceramide, sphingomyelin, and S18 (N-oleoyl serinol)*

Ceramide shown here is N-palmitoyl sphingosine or C16 ceramide. In C18:1 ceramide (N-oleoyl sphingosine), the fatty acid residue is oleic acid (C18:1) instead of palmitic acid (C16:0). Oleic acid is also the fatty acid portion used for synthesis of S18. Sphingolipids were drawn using the tools kit of [www.lipidmaps.org](http://www.lipidmaps.org), S18 was drawn using ChemDraw.

#### Supplemental Figure 2 *GC-MS of ceramide*

The figure shows the GC-MS analysis of C18:1 ceramide. A, GC profile (arrow indicates peak of C18:1 fatty acid). B, MS analysis of the C18:1 peak (fatty acid after methanolysis). C, oleic acid standard. Note that the identity of the mass fragmentation products between in B and C. A similar analysis was performed to identify other ceramide species, in particular C16 ceramide. No sphingoid base was found in the hexane layer.

#### Supplemental Figure 3 *Anti-ceramide antibody induces distribution of membrane-bound aPKC to the cytosol and obliterates microtubule extension to the membrane.*

**A.** Incubation of C17.2 cells with control IgG (pre-immune serum). Endogenous aPKC (red) and  $\alpha$ -tubulin (green) was detected using the respective antibodies. F-actin was stained with Alexa 647-conjugated phalloidin (blue). Note that aPKC and the plus ends of microtubules are co-localized at membrane protrusions. A similar distribution is observed with anti-GA1 or anti-FGFR1 rabbit IgG used as additional control antibodies. **B.** Same as in upper left panel, but after incubation with anti-ceramide rabbit IgG (20  $\mu$ g/ml protein A sepharose eluate) for 4 h. **C.**

Same as in upper right panel, but simultaneous addition of 1  $\mu$ M C16 ceramide. **D.** Same as in lower left panel, but simultaneous addition of 40  $\mu$ M S18. Bars in A-D = 5  $\mu$ m. **E and F.** Phase contrast images at lower magnification than fluorescence images. **E.** ES cell-derived NPs after incubation with pre-immuneserum IgG. **F.** Anti-ceramide antibody. Bar in F = 20  $\mu$ m. Note that cells round up, form clusters, and retract processes after treatment with anti-ceramide antibody.

Supplemental Figure 4 *Ceramide co-localizes with phosphorylated aPKC and Cdc42.*

Confocal laser scanning microscopy was performed with fixed NPs using antibodies against ceramide (Cy2, green), pPKC $\zeta/\lambda$  (Cy5, blue), and Cdc42 (Cy3, red). Arrow indicates co-distribution.

Supplemental Figure 5 *Ceramide is associated with aPKC and  $\alpha$ -tubulin in processes of NPs.*

Confocal laser scanning microscopy was performed using antibodies against ceramide (Cy5, red) and  $\alpha$ -tubulin (Cy3, blue) on fixed NPs that expressed PKC $\zeta$ -GFP (green). **A.** Ectopic expression of PKC $\zeta$ -GFP induces elongated processes that are strongly stained for ceramide at their tips (arrow). **B.** The Cy3-to-Cy5 FRET analysis in these tips and acceptor bleaching was achieved as described in (18). Note that the FRET signal (arrow) was detectable at a site where ceramide co-distributed with aPKC. Also note that this site showed enhanced Cy3 fluorescence after acceptor bleaching by repeated scanning with the 633 nm laser.

Supplemental Figure 6 *Ceramide depletion disturbs cortical lamination of newborn mice.*

Pregnant mice were treated with myriocin from gestational day E11.5 – E15.5 as described in Experimental Procedures. Treatment was then stopped until delivery. Brains of neonates were

extracted, fixed, and subjected to cryo-sectioning. Immunocytochemistry was performed for Map-2 (pseudo-colored in red) and nuclei counterstained with Topro-3 (pseudocolored in blue). Note thickened cortex, abnormal distribution of nuclei, and severely disturbed cortical layers. **A**, Hoechst staining, overview, epifluorescence. Box frames part of the section shown in **B**. **B**, Confocal fluorescence microscopy, bar = 500  $\mu\text{m}$ . **C**, same as in **B**, but higher magnification.

Supplemental Videos *Ceramide depletion impairs NP migration shown by real time live cell imaging.*

Immediately after generating the gap in a scratch migration assay, time lapse photographs were taken every 10 minutes with a microscope equipped with an environmental chamber, which was equilibrated to 37 °C and 5% CO<sub>2</sub> atmosphere. The video was generated using “Quick Time Player” with 6 frames per second and then converted to mov files. **Video a**, control NPs. **Video b**, myriocin-treated NPs.

## Supplemental Figure 1

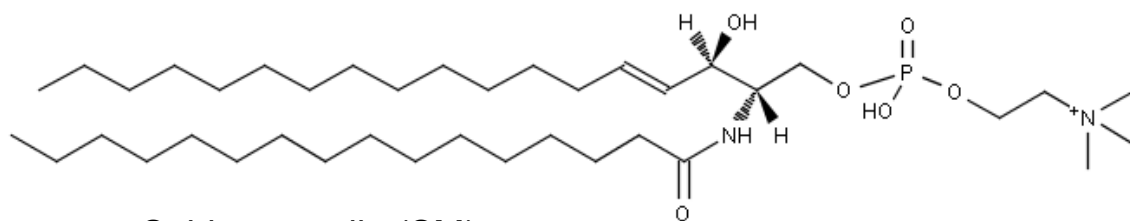

Sphingomyelin (SM)

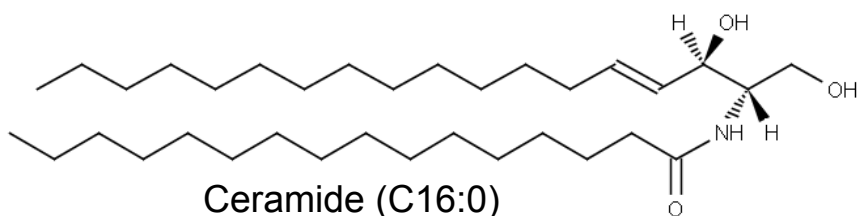

Ceramide (C16:0)

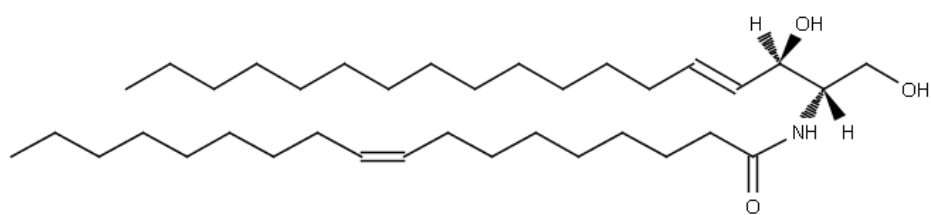

Ceramide (C18:1)

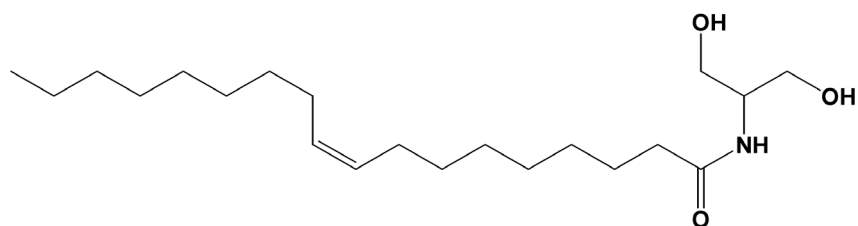

N-oleoyl serinol (S18)

# Supplemental Figure 2

A

## GC for fatty acids from ceramide

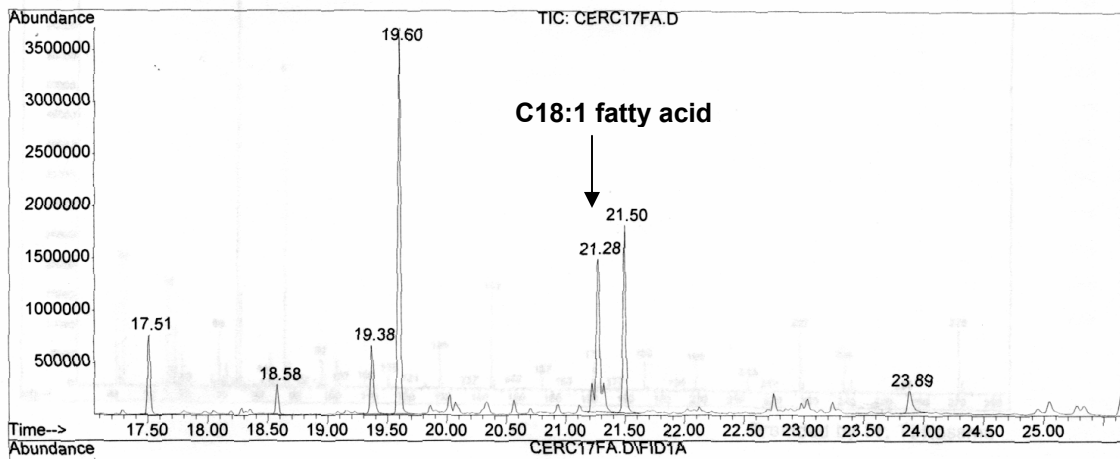

B

## MS for C18:1 fatty acid peak

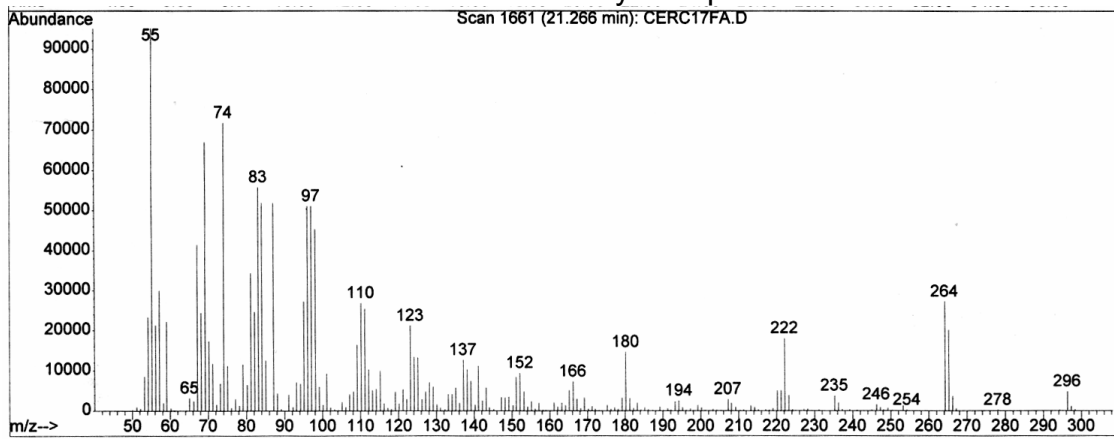

C

## C18:1 standard

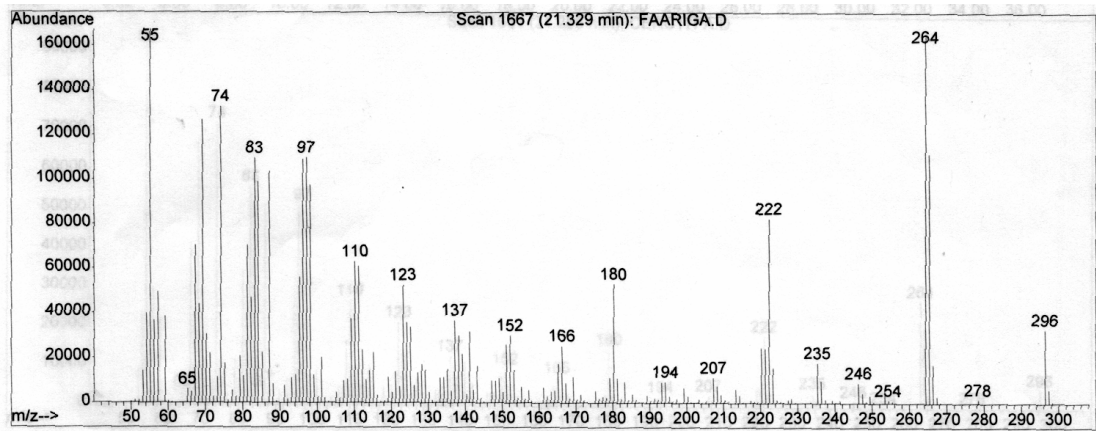

Supplemental Figure 3

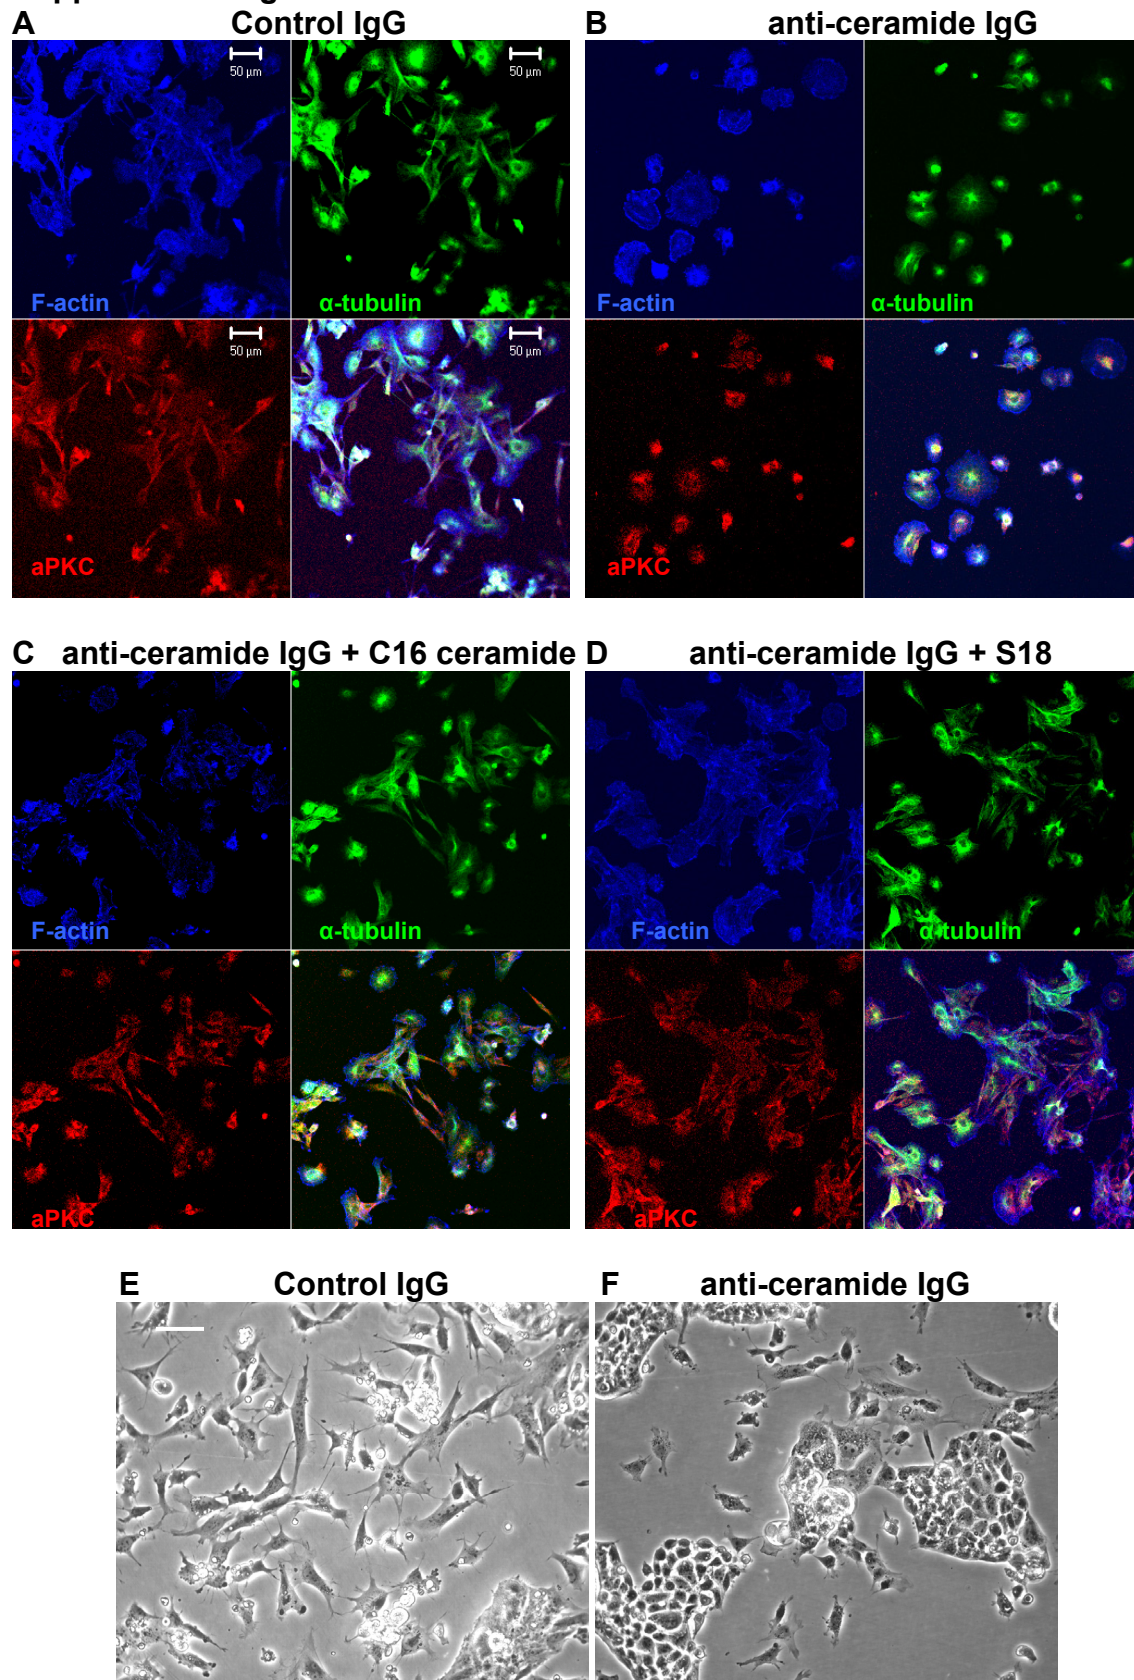

Supplemental Figure 4

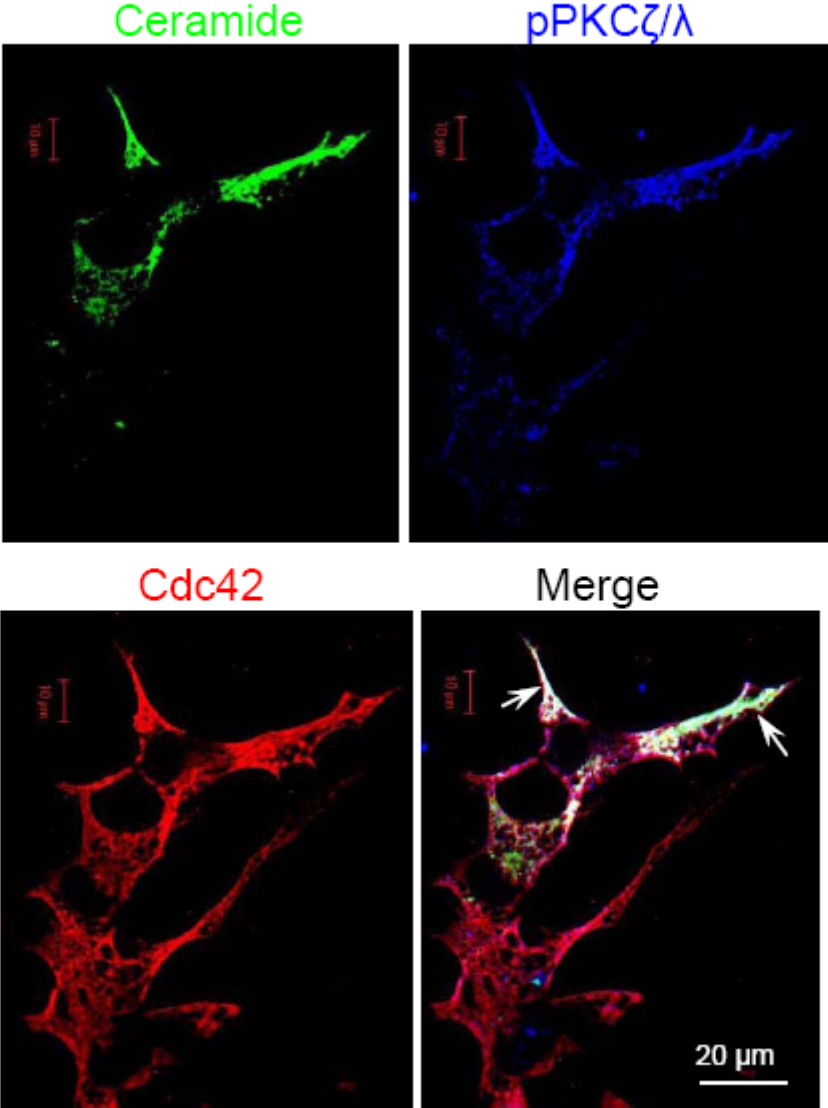



Supplemental Figure 5

A

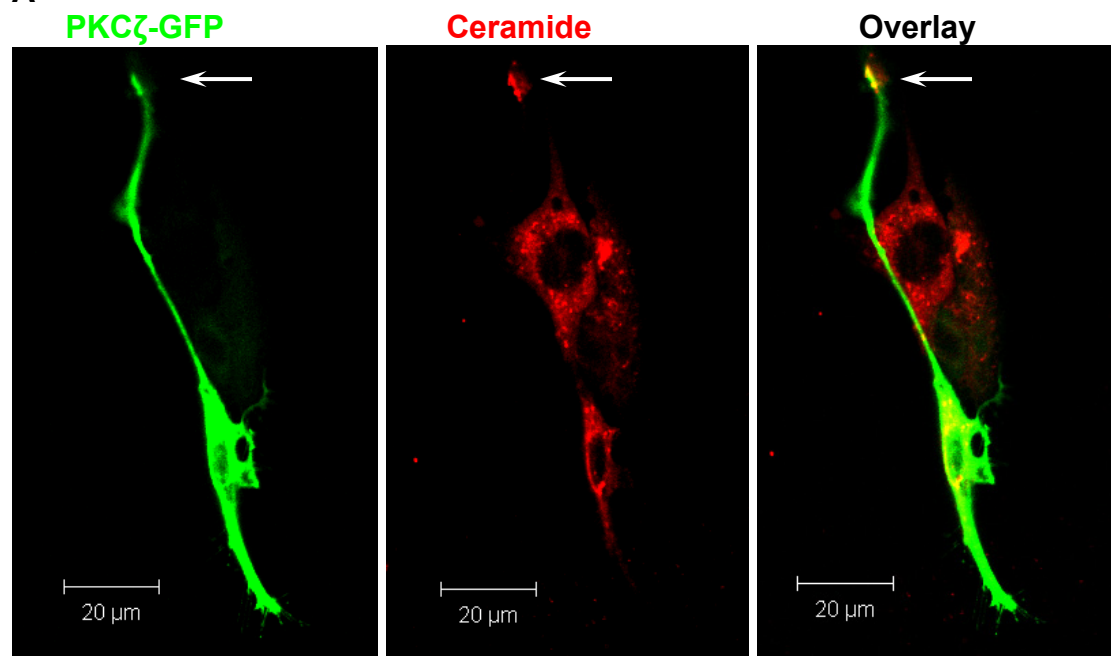

B

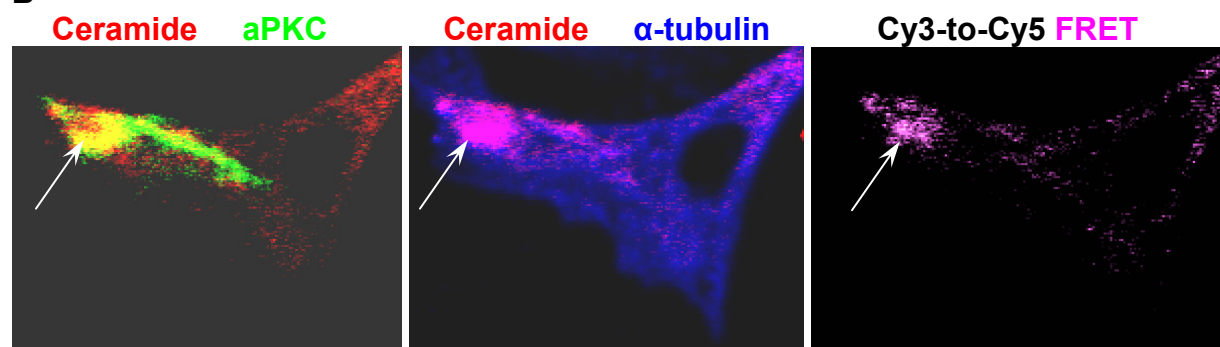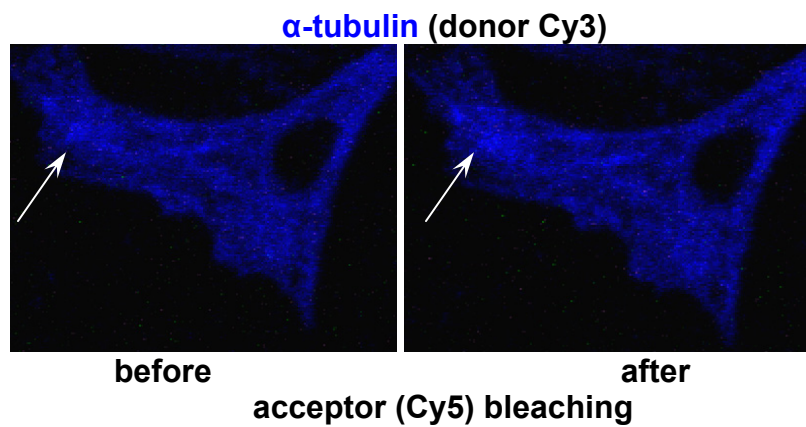



Supplemental Figure 6

A

Control

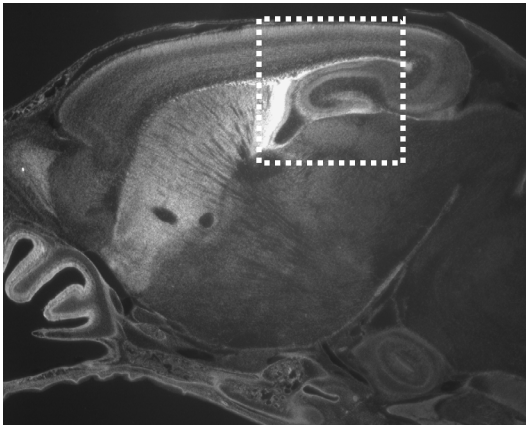

Myriocin

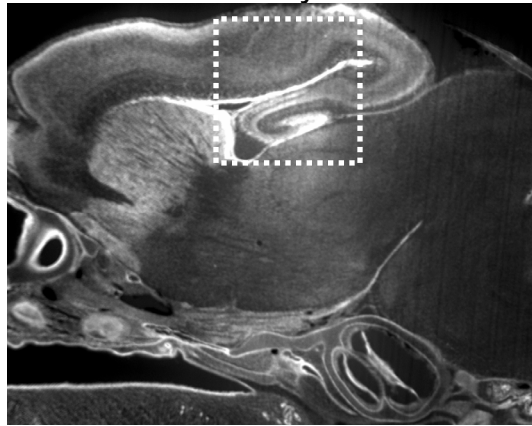

B

Map-2

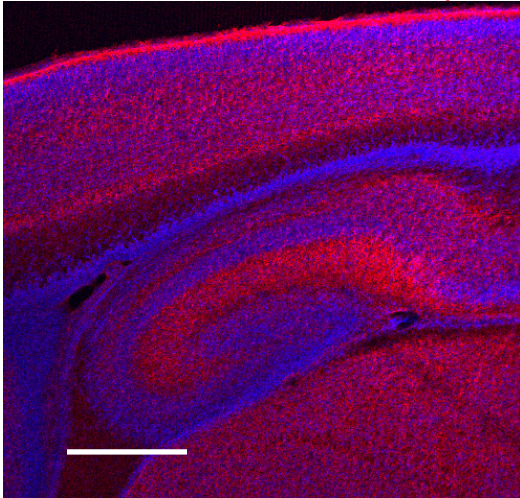

Topro-3

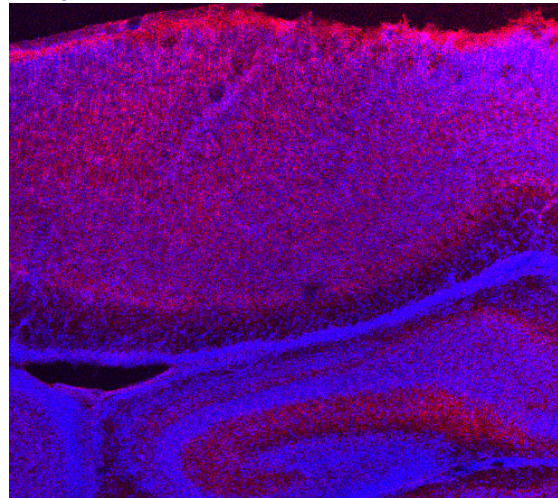

C

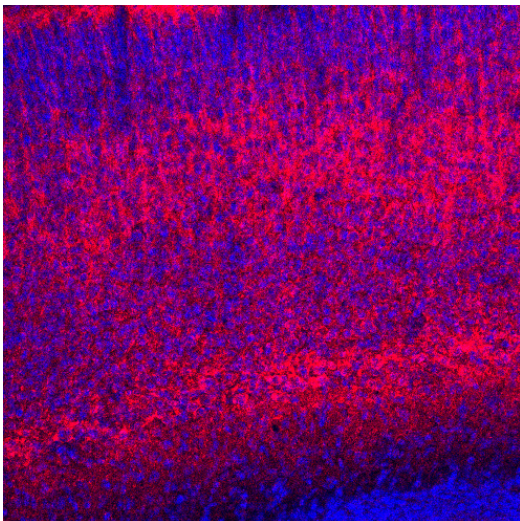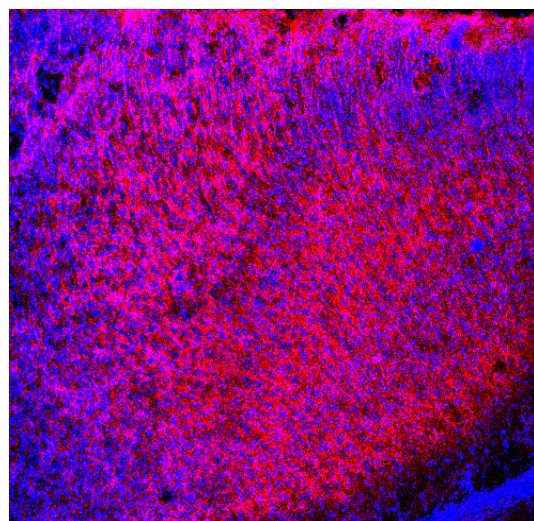

Supplement: NIHMS521798-supplement-Supp.pdf [file NIHMS521798-supplement-Supp.pdf]
